# Supplementary material for: The 100 Most Frequently Cited Articles on Myopia
Source: J Ophthalmol. 2023 May 11;2023:7131105. doi: 10.1155/2023/7131105 (PMC10195181; doi:10.1155/2023/7131105)
Supplement: Supplementary Materials — Supplementary table 1: data that were recorded from each paper. Supplementary table 2: the 100 most frequently cited papers on myopia in the descending order. [file 7131105.f1.zip]

Archive with 2 entries (2 files):
- eTable 1.docx
- eTable 2 revised.docx
